# Supplementary material
Source: HighWire-hosted journal article supplement (http://www.cmaj.ca/highwire/filestream/79029/field_highwire_adjunct_files/3/202756-res-4-at.pdf)
Supplement: 202756-res-4-at.pdf [file 202756-res-4-at.pdf]

**Appendix 4:** Cumulative Count of Retirement Home COVID-19 Cases and Deaths, Ontario, Mar 1-Dec. 18 2020 (N=770 homes)

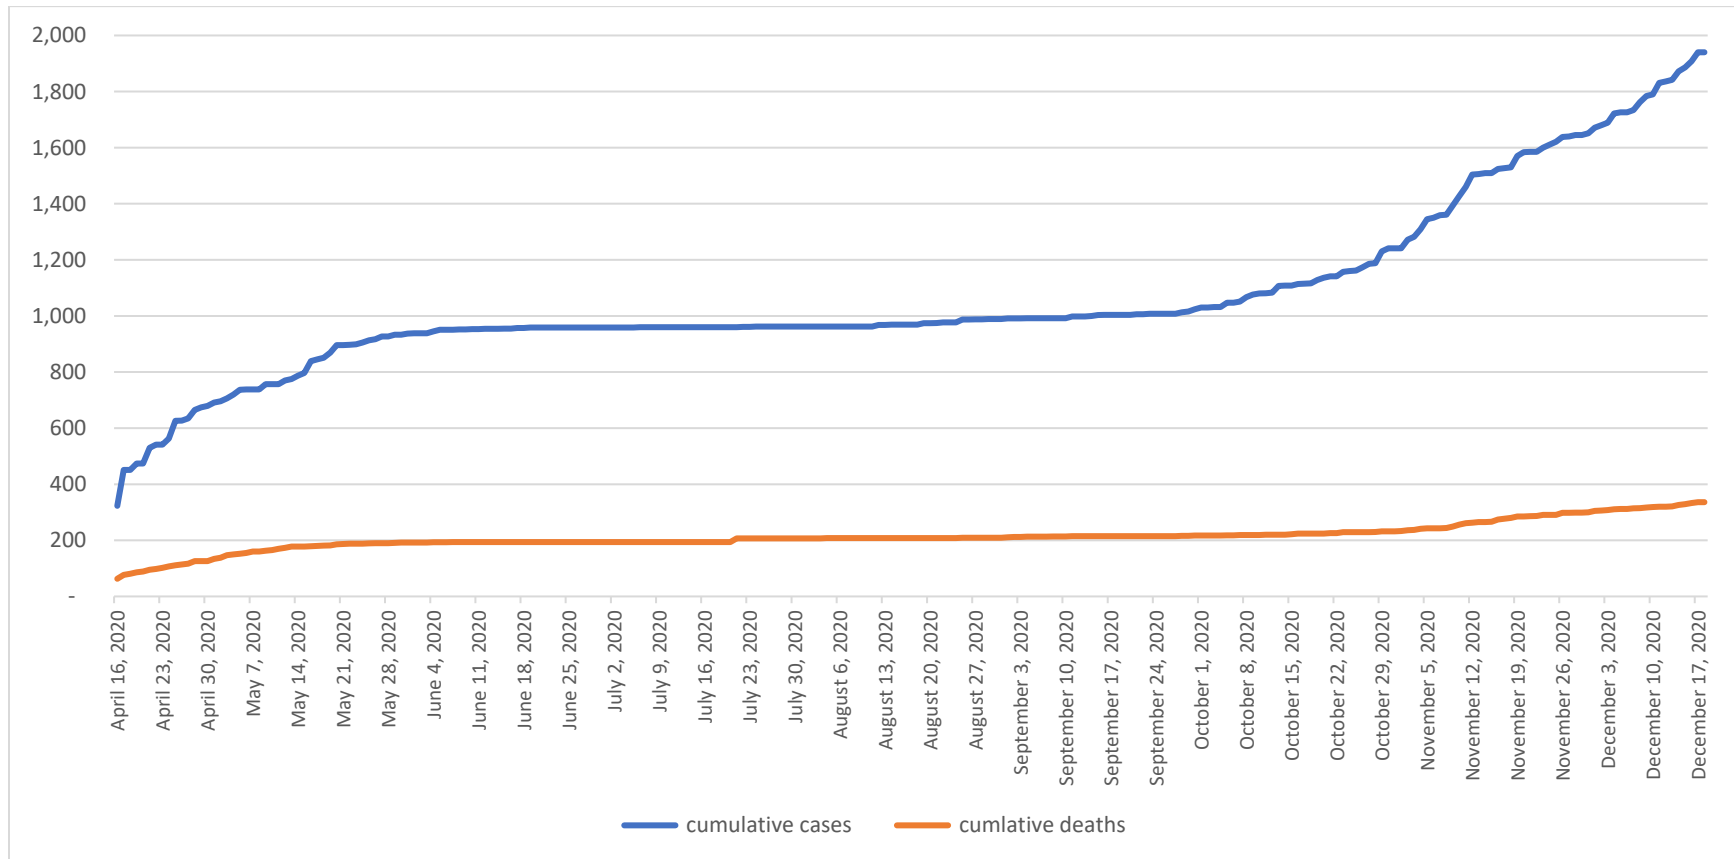

Appendix 4, as supplied by the authors. Appendix to: Costa AP, Manis DR, Jones A, et al. Risk factors for outbreaks of SARS-CoV-2 infection at retirement homes in Ontario, Canada: a population-level cohort study. *CMAJ* 2021. doi: 10.1503/cmaj.202756. Copyright © 2021 The Author(s) or their employer(s). To receive this resource in an accessible format, please contact us at [cmajgroup@cmaj.ca](mailto:cmajgroup@cmaj.ca).
